# Supplementary material
Source: publisher figshare collection journal article supplement (https://karger.figshare.com/articles/dataset/_/5125201)
Supplement: Supplementary file 1 [file 1 › 000351662_sm_ tables.pdf]

# Supplementary Table S1

Comparison of responders and all registered dentists. Total number of sampled or registered dentists and number of dentists who responded to each item are given. There was no statistically significant difference between groups ( $p > 0.05$ , Chi-square/Mann-Whitney).

|                             | <b>Responders<br/>(n=821)</b>         | <b>Registered*<br/>(n=2346)</b> |
|-----------------------------|---------------------------------------|---------------------------------|
| <b>Demographic data</b>     |                                       |                                 |
| Gender (male/female)        | 63% / 37% (n=789)                     | 63% / 37%                       |
| Year of birth               | 1964 (1956/1973) (n=803)              | 1964 (1955/1973)                |
| Dental license since        | 1992 (1984/2000) <sup>a</sup> (n=803) | 1993 (1985/2001)                |
| <b>Clinical setting</b>     |                                       |                                 |
| Practice size               | (n=795)                               |                                 |
| Single practitioner         | 41%                                   | 42%                             |
| Two practitioners           | 37%                                   | unknown                         |
| >2 practitioners            | 22%                                   | unknown                         |
| Practice location           | (n=793)                               |                                 |
| city (>100,000 inhabitants) | 33%                                   |                                 |
| town                        | 54%                                   | unknown                         |
| rural                       | 12%                                   |                                 |

\* data from Zahnärztekammer Schleswig-Holstein, 1.7.2012

Supplementary Table S2

Results of comparative sensitivity analysis between responders and previous non-responders for items. No statistical difference between groups was detected ( $p>0.05$ , Chi-square).

| Item battery | Item                                         | p (Chi-square) |
|--------------|----------------------------------------------|----------------|
| 1            | Hardness                                     | 0.92           |
|              | Moisture                                     | 0.49           |
|              | Colour                                       | 0.47           |
| 2            | Metal bur                                    | 0.33           |
|              | Ceramic bur                                  | 0.50           |
|              | Polymeric bur                                | 0.64           |
|              | Hand excavator                               | 0.95           |
| 4            | Calcium hydroxide suspension                 | 0.50           |
|              | Calcium hydroxide cement                     | 0.94           |
|              | Base                                         | 0.24           |
|              | No Liner or base                             | 0.49           |
| 3            | Direct capping                               | 0.97           |
|              | Root canal treatment                         | 0.28           |
|              | Stepwise excavation                          | 0.61           |
|              | One-step incomplete                          | 0.98           |
| 5            | Success Indirect capping                     | 0.06           |
|              | Success Incomplete excavation                | 0.06           |
|              | Success direct capping                       | 0.26           |
|              | Success root canal treatment                 | 0.66           |
| 6            | Complete, since caries might progress        | 0.09           |
|              | Complete, since caries might harm pulp       | 0.53           |
|              | Incomplete, since sealed caries arrests      | 0.86           |
|              | Incomplete to avoid pulpal exposure          | 0.14           |
| 8            | Invasive to facilitate restoration longevity | 0.88           |
|              | Less invasive accepting re-treatment         | 0.33           |
|              | Legal regulations                            | 0.57           |
| 7            | Renew restoration                            | 0.67           |
|              | Monitor restoration                          | 0.51           |
