# Supplementary material
Source: publisher figshare collection journal article supplement (https://karger.figshare.com/articles/dataset/_/5125201)

Supplementary Figure S1

Radiograph showing a deep restoration with residual caries in proximity to the pulp.

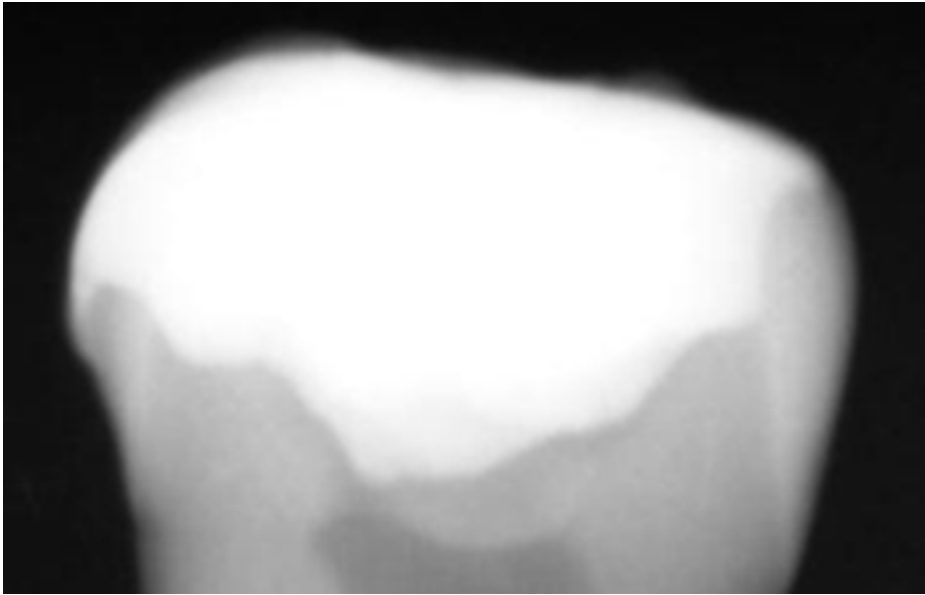

Supplement: Supplementary file 1 [file 1 › 000351662_sm_Figure.pdf]
